# Supplementary material for: Oxidative Transformation of Dihydroflavonols and Flavan-3-ols by Anthocyanidin Synthase from Vitis vinifera
Source: MDPI journal article supplement (doi:10.3390/molecules27031047), 2022-02-03
Supplement: s1 [file s1]

## Supplementary Material

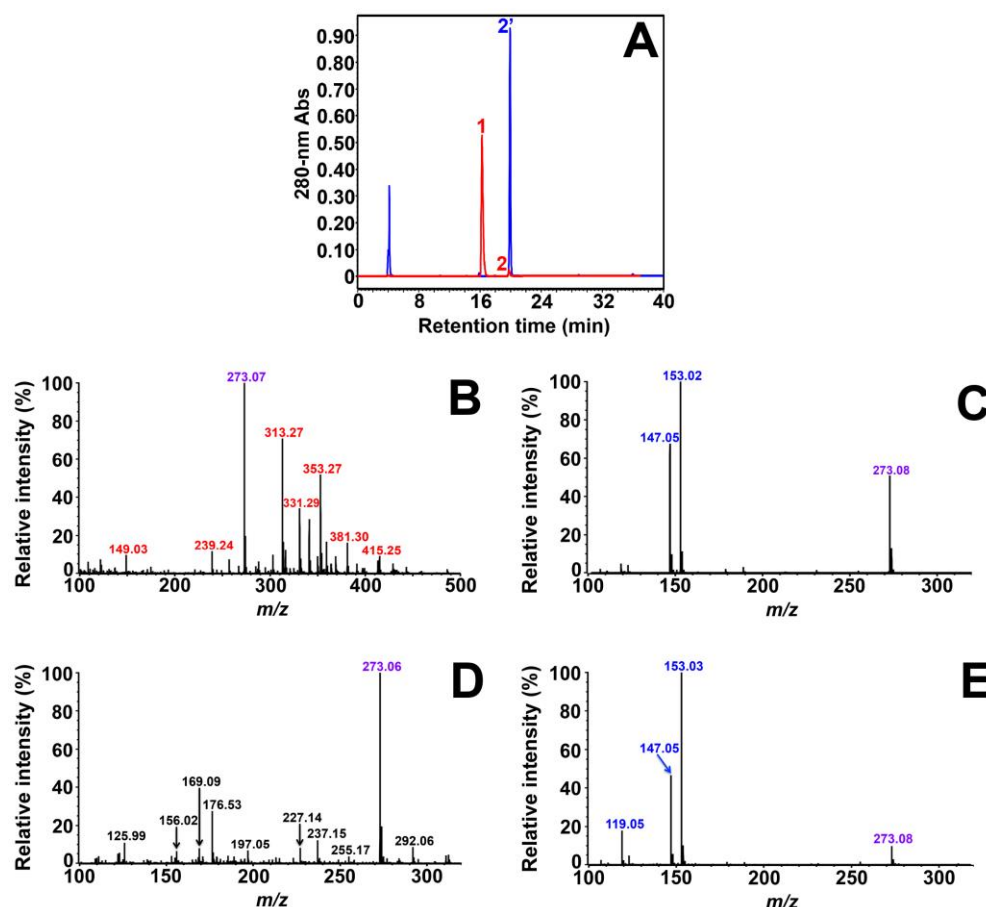

**Figure S1. Identification of the contaminant of the commercial product of (+)-DHK.**

The contaminant visualized as peak 2 was purified and collected during HPLC analysis, and then directly analyzed by MS and MS/MS. **(A)** HPLC analysis of the commercial standard of 100  $\mu$ M (+)-DHK in the reaction mixture without enzyme (in red) and the commercial standard of 100  $\mu$ M (±)-naringenin in methanol (in blue). The minor blue peak observed at 4 min corresponds to the ascorbate present in the reaction mixture as a cofactor of VvANS. **(B)** MS analysis of the collected peak 2.  $m/z$  149, 239, 313, 331, 353, 381 and 415 are contaminant ions derived from phthalate or plasticizer in methanol extracts [42]. **(C)** MS/MS fragmentation of the  $[M+H]^+$  ion with  $m/z$  273 observed in (B). **(D)** and **(E)** are the MS and MS/MS spectra of commercial (±)-naringenin.

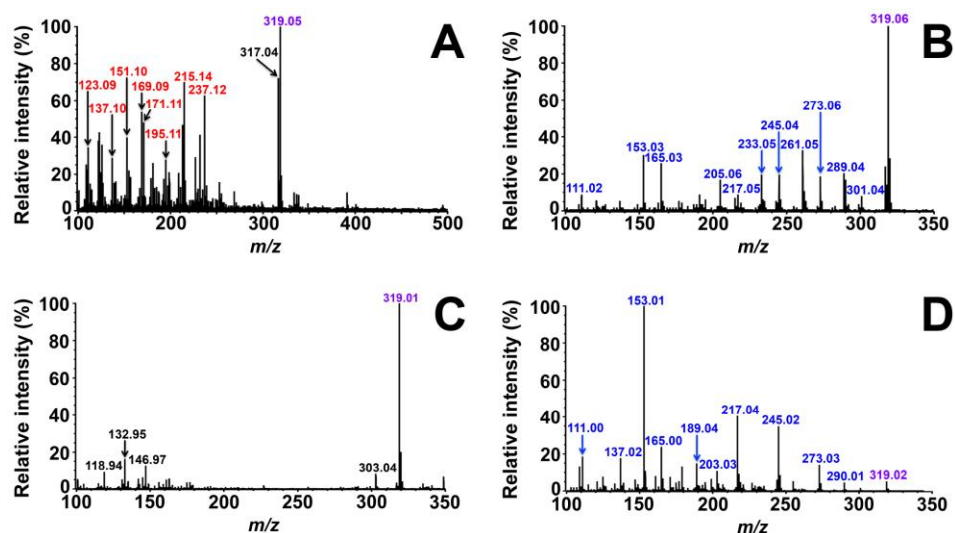

**Figure S2. MS and MS/MS analysis of the product visualized as peak 3 in Figure 3B.**

The product visualized as peak 2 was purified and collected during HPLC analysis, and then directly analyzed by MS and MS/MS. **(A)** MS analysis of the collected peak 3.  $m/z$  123, 137, 151, 169, 171, 195, 215 and 237 are contaminant ions derived from phthalate or plasticizer in methanol extracts [42]. **(B)** MS/MS fragmentation of the  $[M+H]^+$  ion with  $m/z$  319 observed in (A). **(C)** and **(D)** are the MS and MS/MS spectra of the commercial standard of myricetin.

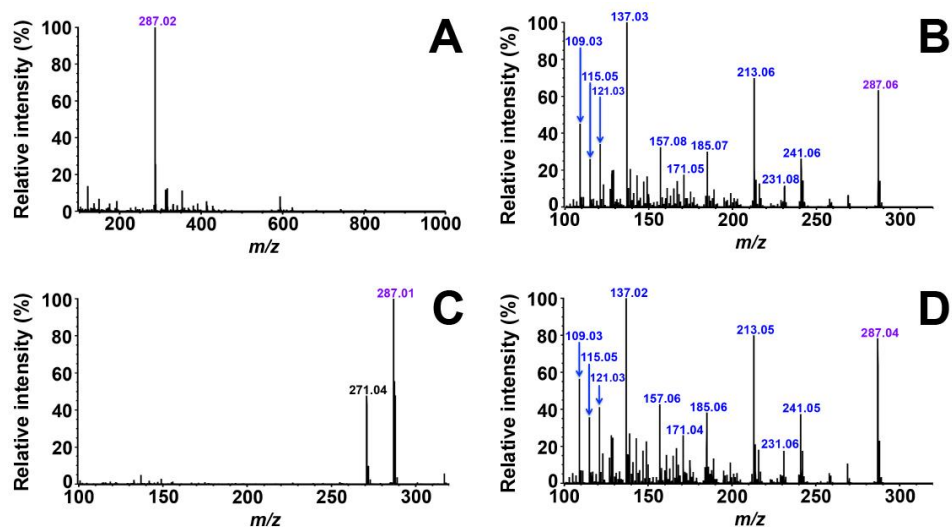

**Figure S3. MS and MS/MS analysis of the product visualized as peak 4 in Figure 5B.**

The product visualized as peak 4 was purified and collected during HPLC analysis, and then directly analyzed by MS and MS/MS. **(A)** MS analysis of the collected peak 4. **(B)** MS/MS fragmentation of the  $[M+H]^+$  ion with  $m/z$  287 observed in (A). **(C)** and **(D)** are the MS and MS/MS spectra of the commercial standard of cyanidin chloride.

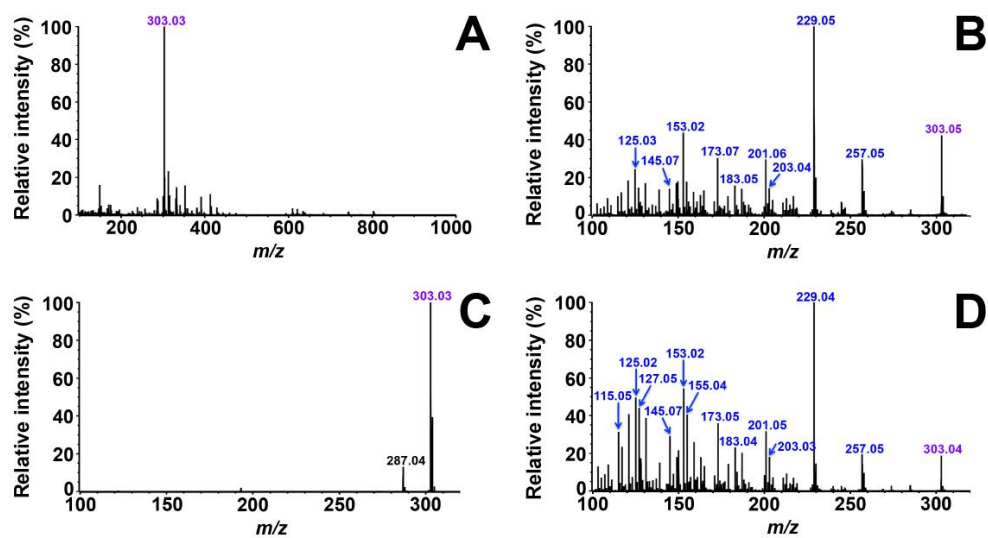

**Figure S4. MS and MS/MS analysis of the product visualized as peak 2 in Figure 6B.**

(A) and (B) are the MS and MS/MS spectra obtained from peak 2. (C) and (D) are the MS and MS/MS spectra of the commercial standard of delphinidin chloride.

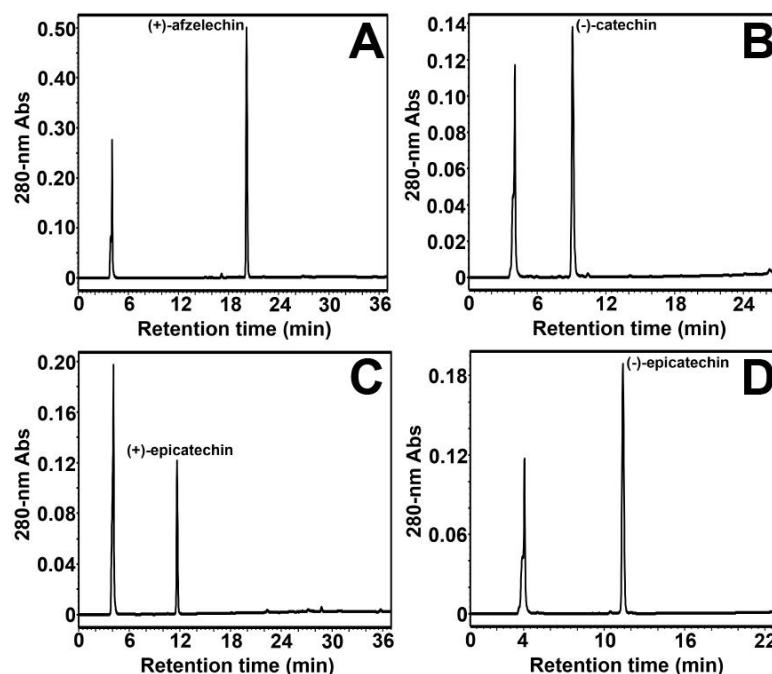

**Figure S5. Reverse-Phase HPLC analysis of the transformation of (+)-afzelechin (A), (-)-epicatechin (B), (+)-epicatechin (C) and (-)-epicatechin (D) by VvANS.**

The peak observed at 4 min in all cases corresponds to ascorbate present in the reaction mixture as a cofactor of VvANS, and no new product is observed after incubation with VvANS for each of these four flavan-3-ols, indicating that they are not substrates of VvANS.

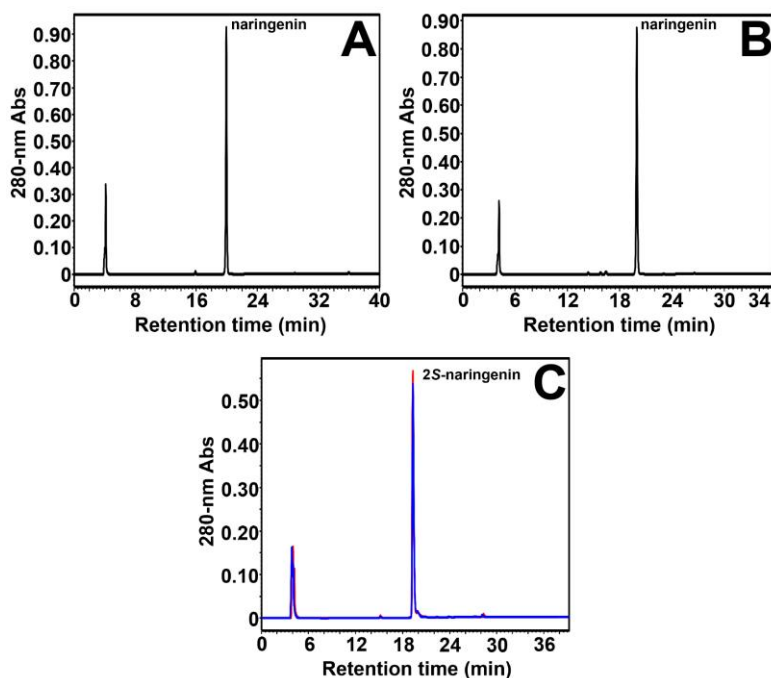

**Figure S6. Reverse-Phase HPLC analysis of the enzymatic transformation of naringenin.**

(A) Commercial standard of 100  $\mu\text{M}$  ( $\pm$ )-naringenin in the reaction mixture without enzyme. (B) Enzymatic transformation of 100  $\mu\text{M}$  ( $\pm$ )-naringenin. (C) In red, commercial standard of 100  $\mu\text{M}$  2*S*-naringenin in the reaction mixture without enzyme; in blue, enzymatic transformation of 100  $\mu\text{M}$  2*S*-naringenin. The small peaks observed at about 4 min corresponds to ascorbate in all cases, and naringenin is eluted at about 20 min. No new products are observed upon the enzymatic degradation of both ( $\pm$ )-naringenin and 2*S*-naringenin, indicating that naringenin is not substrate of VvANS.

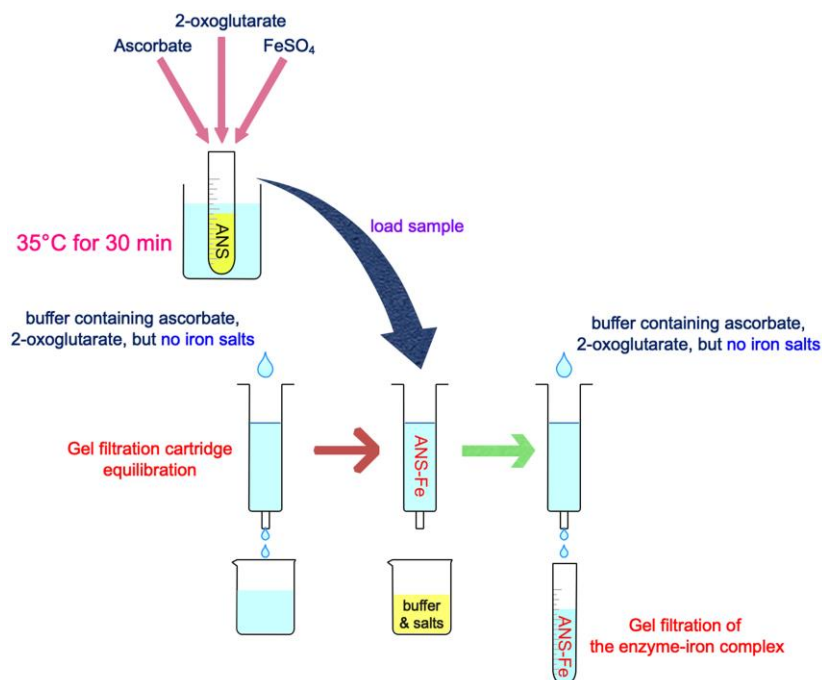

**Figure S7. Protocol of production of the VvANS-iron(II)-oxoglutarate complex.**

The production is carried out in 20 mM ammonium acetate containing 20 mM NaCl, and the pH is finally adjusted to 6.3 after the addition of 2-oxoglutarate (2OG) and ascorbate. The holoenzyme (VvANS,  $10^{-6}$  M) is first incubated in the presence of 2OG (1 mM) which serves as a bidentate ligand of iron(II) at the active site of the enzyme at rest [44], and ascorbate (2 mM) which is a cofactor of ANS and which can also keep the iron salt (30  $\mu$ M) in the form of iron(II) despite the presence of oxygen. The preformed VvANS-iron(II)-oxoglutarate complex is then loaded onto a gel filtration cartridge (PD-10 desalting column, GE Healthcare) and eluted with buffer containing 2OG (1 mM) and ascorbate (2 mM), but no iron salt. The gel filtration elution allowed us to collect the eluted VvANS-iron(II)-oxoglutarate complex before elution of the low molecular weight solutes, to avoid any free iron salt contamination.

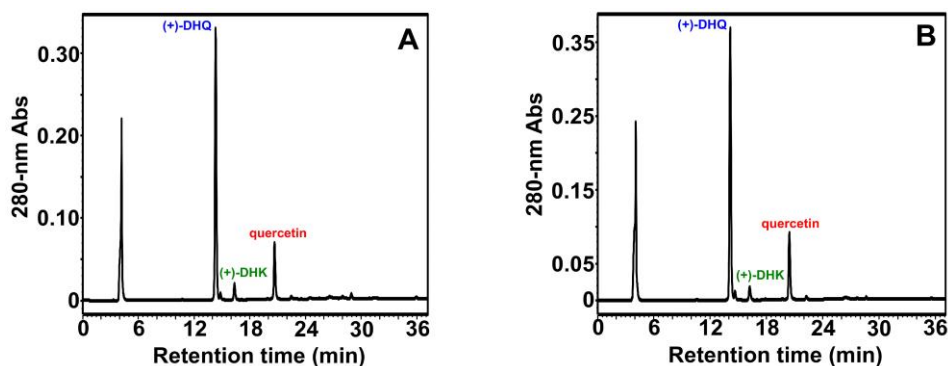

**Figure S8. HPLC determination of the activity of the VvANS-iron(II) complex.**

Quercetin was observed as the only enzymatic product of VvANS when (+)-DHQ was used as the polyphenolic substrate. Note that (+)-DHK was the contaminant of the commercial standard of (+)-DHQ. **(A)** Oxidative transformation of (+)-DHQ by the VvANS-iron(II) complex in the absence of iron(II) salt, and the enzymatic reaction was performed using the method described in section 3.2.1. **(B)** Oxidative transformation of (+)-DHQ by VvANS in the presence of iron(II) salt. The VvANS-iron(II)-oxoglutarate complex was produced using the protocol described in Fig. S7. The reaction mixture (2.5 mL, final volume) contained 20 mM ammonium acetate, 20 mM NaCl, 2 mM ascorbate, 1 mM 2OG and  $\approx 10^{-6}$  M VvANS-iron(II) complex, pH 6.3 (at 35°C). The reaction was initiated by the addition of 100  $\mu$ M (+)-DHQ, and then incubated at 35°C for 15 min under gentle magnetic stirring. A 100  $\mu$ L portion of the reaction mixture was then analyzed by reverse-phase HPLC.

**Figure S9. Oxygen signal perturbation upon injection of methanolic solution of (+)-catechin.**

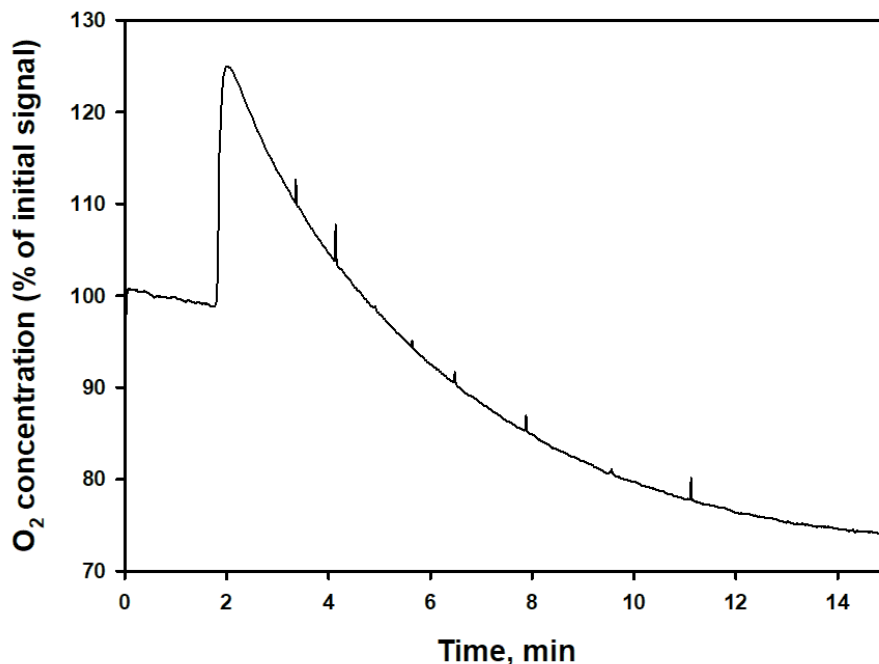

Monitoring of dissolved oxygen with an optical-fiber oximeter (FireSting-O<sub>2</sub>, Pyroscience GmbH). A stock solution of 2 mM (+)-catechin was dissolved in 100% methanol. Upon addition of 125  $\mu$ L of this stock solution into 2.250 mL of reactional medium containing 2OG, ascorbate and oxoglutarate-Fe<sup>II</sup>-VvANS ( $\leq 1$   $\mu$ M) under magnetic stirring, a sharp jump is observed which prevents reliable measurement of true oxygen consumption for several minutes. In the absence of enzyme, a similar jump is observed, but it takes more than 4 min for the signal to return to a stable lower value. During these 4-5 min, if the enzyme is present, it consumes substantial but ill-defined amounts of O<sub>2</sub> and polyphenol. This prevents reliable measurements of initial rates at steady state. Similar results are obtained with ethanol instead of methanol, or with a Clark electrode instead of the FireSting-O<sub>2</sub>.

**Figure S10. Sequence alignments of VvANS with ANS and LDOX from *Medicago truncatula***

**1. Query = Vv ANS ; Subject = Mt ANS (NCBI protein BLAST)**

|       | Score          | Expect                                                       | Method                       | Identities   | Positives    | Gaps      |
|-------|----------------|--------------------------------------------------------------|------------------------------|--------------|--------------|-----------|
|       | 569 bits(1466) | 0.0                                                          | Compositional matrix adjust. | 273/348(78%) | 309/348(88%) | 1/348(0%) |
| Query | 2              | VAVERVESLAKSGIISIPKEYIRPKEELESINDVFLEEKKEDGPQVPTIDLKNIESDDEK |                              |              |              | 61        |
|       |                | +RVESLA SGI SIPKEY+RPKEEL +I ++F EEKKE GPQVPTIDLK I S DE     |                              |              |              |           |
| Sbjct | 3              | TVAQRVESLALSGISSIPKEYVRPKEELANIGNIFDEEKKE-GPQVPTIDLKEINSSDEI |                              |              |              | 61        |
| Query | 62             | IRENCIEELKKASLDWGMHLINHGPADLMERVKKAGEEFFSLSVEEKEYANDQATGK    |                              |              |              | 121       |
|       |                | +R C E+LKKA+ +WGMHL+NHGI DL+ R+KKAGE FF L VEEKEYANDQ++GK     |                              |              |              |           |
| Sbjct | 62             | VRGKCREKLKKAEEWGMHLVNHGISDDLINRLKKAGETFFELPVEEKEYANDQSSGK    |                              |              |              | 121       |
| Query | 122            | IQGYGSKLANNASGQLEWEDYFFHLAYPEEKRDLSIWPKTPSDYIEATSEYAKCLRLLAT |                              |              |              | 181       |
|       |                | IQGYGSKLANNASGQLEWEDYFFH +PE+KRDLSIWPKTP+DY + TSEYAK LR+LA+  |                              |              |              |           |
| Sbjct | 122            | IQGYGSKLANNASGQLEWEDYFFHCIFPEDKRDLSIWPKTPADYTKVTSEYAKELRVLAS |                              |              |              | 181       |
| Query | 182            | KVFKALSVGLGLEPDRLEKEVGGLEELLQMKINYYPKCPQPELALGVEAHTDVSALTFI  |                              |              |              | 241       |
|       |                | K+ + LS+ LGLE RLEKE GG+EELLQMKINYY CPQPELALGVEAHTDVS+LTF+    |                              |              |              |           |
| Sbjct | 182            | KIMEVLSLELGLGGRLEKEAGGMEELLQMKINYYPICPQPELALGVEAHTDVSSLTFL   |                              |              |              | 241       |
| Query | 242            | LHNMVPGQLQFYEGKWVTAKCVPDSIVMHIGDTLEILSNGKYKSILHRGLVNKEKVRISW |                              |              |              | 301       |
|       |                | LHNMVPGQLQFYEGKWVTAKCVPDSI+MHIGDT+EILSNGKYKSILHRGLVNKEKVRISW |                              |              |              |           |
| Sbjct | 242            | LHNMVPGQLQFYEGKWVTAKCVPDSILMHIGDTIEILSNGKYKSILHRGLVNKEKVRISW |                              |              |              | 301       |
| Query | 302            | AVFCEPPKDKIVLKPLPEMVSVESPAKFPPRTFAQHIEHKLFGKEQEE             |                              |              | 349          |           |
|       |                | AVFCEPPK+KI+LKPLPE+V+ + PA+FPPRTFAQHI HKLF K++EE             |                              |              |              |           |
| Sbjct | 302            | AVFCEPPKEKIILKPLPELVTEKEPARFPPRTFAQHIHKLFRKDEEE              |                              |              | 349          |           |

**2. Query = Vv ANS ; Subject = Mt LDOX (NCBI protein BLAST)**

|       | Score         | Expect                                                       | Method                       | Identities   | Positives    | Gaps       |
|-------|---------------|--------------------------------------------------------------|------------------------------|--------------|--------------|------------|
|       | 271 bits(694) | 5e-94                                                        | Compositional matrix adjust. | 145/342(42%) | 218/342(63%) | 16/342(4%) |
| Query | 4             | VERVESLAKSGIISIPKEYIRPKEELESINDVFLEEKKEDGPQVPTIDLKNIESDDEKIR |                              |              |              | 63         |
|       |               | V+RV++LA + + +P ++IR E K +G VP I L +                         |                              |              |              |            |
| Sbjct | 3             | VKRVQTLACNQLKELPPQFIRLANERPE-----NTKAMEGVTVPMISL-----SQPH    |                              |              |              | 49         |
| Query | 64            | ENCIEELKKASLDWGMHLINHGPADLMERVKKAGEEFFSLSVEEKEYANDQATGKIQ    |                              |              |              | 123        |
|       |               | ++++ +A+ +WG + +HGI L++ ++ G+EFFSL +EKE YAND ++GK            |                              |              |              |            |
| Sbjct | 50            | NLLVKKINEAASEWGFFVITDHGISQKLIQSLQDVGQEFFSLPQKEKETYANDPSSGKFD |                              |              |              | 109        |
| Query | 124           | GYGSKLANNASGQLEWEDYFFHLAYPEEKRDLSIWPKTPSDYIEATSEYAKCLRLLATKV |                              |              |              | 183        |
|       |               | GYG+K+ N ++EW DY+FHL P K + +WPK+P Y E EY K + + +             |                              |              |              |            |
| Sbjct | 110           | GYGTKMTKNLEQKVEWVDYYFHLMSPHSKLNFEMWPKSPPSYREVVEYNKEMLRVTDNI  |                              |              |              | 169        |
| Query | 184           | FKALSVGLGLEPDRLEKEVGGLEELLQMKINYYPKCPQPELALGVEAHTDVSALTFILH  |                              |              |              | 243        |
|       |               | + LS GL LE L+ +GG EE+ L+MKIN YP CPQPELALGVE HTD+SA+T ++      |                              |              |              |            |
| Sbjct | 170           | LELLSEGLELESKTLKSLGG-EEIELEMKINMYPPCPQPELALGVEPHTDMSAITLLVP  |                              |              |              | 228        |
| Query | 244           | NMVPGLQLFYEGKWVTAKCVPDSIVMHIGDTLEILSNGKYKSILHRGLVNKEKVRISWAV |                              |              |              | 303        |
|       |               | N VPGLQ++ + WV + +++ +HIGD LE+LSNG+YKS+LHR LVNKE+ R+SWAV     |                              |              |              |            |
| Sbjct | 229           | NDVPGLQVWKDNNWVAVNYLQNALFVHIGDQLEVLNSNGRYKSVLHRSVLNKERKMSWAV |                              |              |              | 288        |
| Query | 304           | FCEPPKDKIVLKPLPEMVSVESPAKFPPRTFAQHIEHKLFGK                   |                              |              | 345          |            |
|       |               | F PP + +V+ PLP +V+ ++PAKF +T+A++ ++ F K                      |                              |              |              |            |
| Sbjct | 289           | FVAPPHE-VVVGPLPPLVNDQNPAKFSTKYAEY-RYRKFNK                    |                              |              | 328          |            |
